# Supplementary material for: Light-induced perovskite dynamic transformation enabling a photodetector to mimic a neuromorphic vision sensing system
Source: Royal Society of Chemistry journal article supplement (doi:10.1039/d1tc05285c), 2022-01-01
Supplement: d1tc05285c1.pdf [file d1tc05285c1.pdf]

Supporting Information

**Light-induced perovskite dynamic transformation enabling  
photodetector mimicking neuromorphic vision sensing system**

Yuqing Song, Xiaobao Xu, Yuanzhou Zhang, Zeyao Han, Jiaxin Liu, Junyu Li, Yousheng Zou\*

*Key Laboratory of Advanced Display Materials and Devices, Ministry of Industry and Information Technology, Institute of Optoelectronics and Nanomaterials, School of Material Science and Engineering, Nanjing University of Science and Technology, Nanjing 210094, China.*

\* Corresponding authors. E-mail address : yshzou75@njust.edu.cn

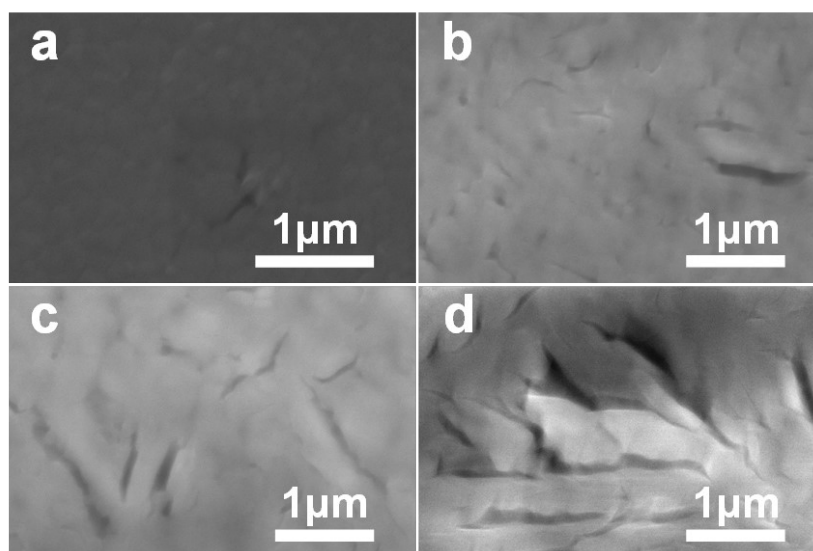

Fig. S1 SEM images of (a) pristine MAPbI<sub>3</sub> film and films exposed to NH<sub>3</sub> atmosphere for (b) 10 s, (c) 20 s, (d) 30s.

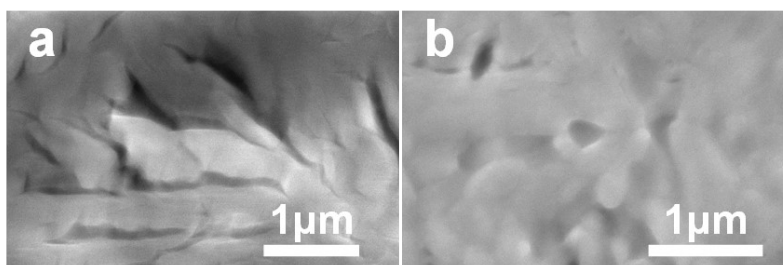

Fig. S2 SEM images of 30s-NH<sub>3</sub>-treated MAPbI<sub>3</sub> films (a) without and (b) with irradiation recovery.

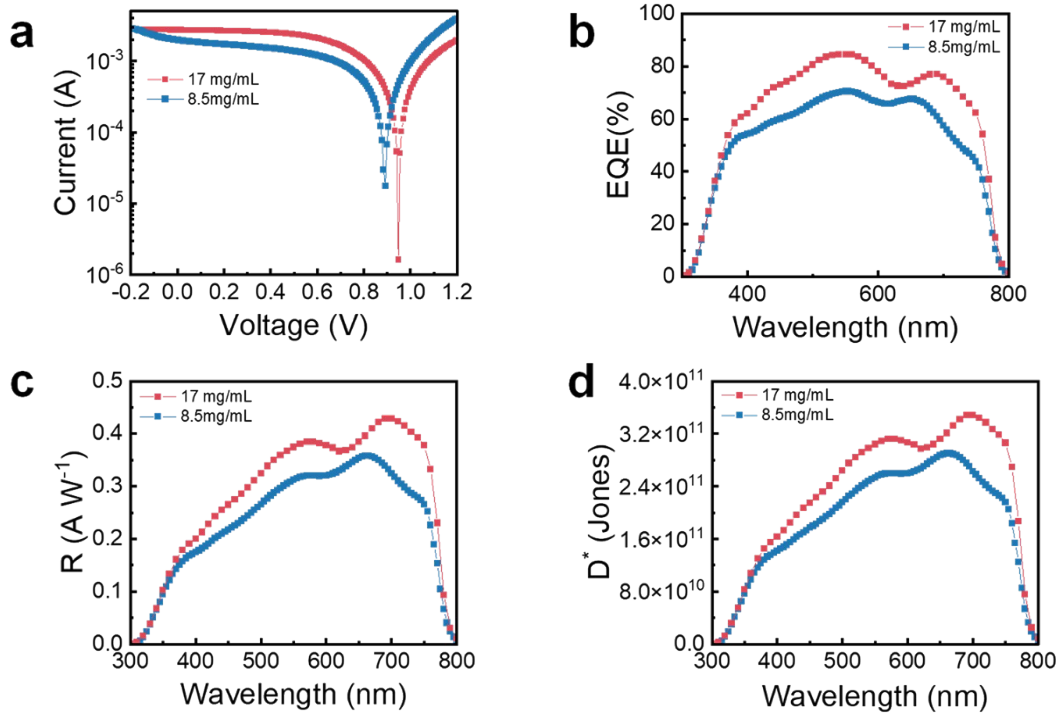

Fig. S3 Device characterizations of different PCBM thickness. (a) I-V curves of devices under AM 1.5G illumination. (b) EQE. (c) Responsivity. (d) Specific detectivity ( $D^*$ ).

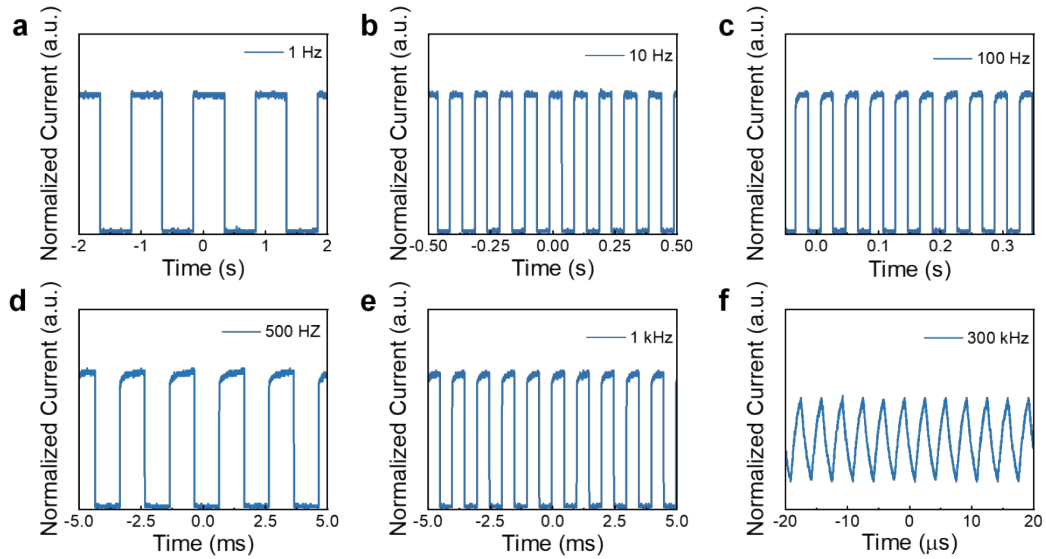

Fig. S4 Response to temporal square-wave signals at different frequency (a)-(f) of 1 Hz, 10 Hz, 100 Hz, 500 Hz, 1 kHz, 300 kHz.

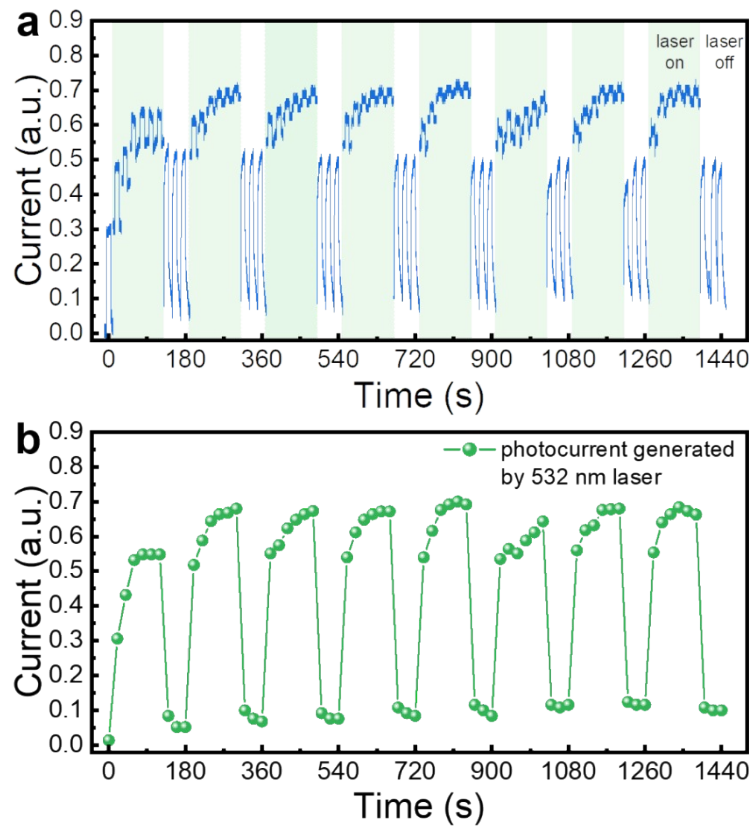

Fig. S5 (a) Time-dependent response of photodetector in 8 cycles, the green area indicates “laser on”, the white area indicates “laser off”. (b) Corresponding changes of photocurrent generated by 532 nm laser in 8 cycles.
